# Supplementary material for: PI3Kα/δ inhibition promotes anti-tumor immunity through direct enhancement of effector CD8+ T-cell activity
Source: PubMed Central journal article supplement (PMC6307194; doi:10.1186/s40425-018-0457-0), 2018-12-27

Figure S3.

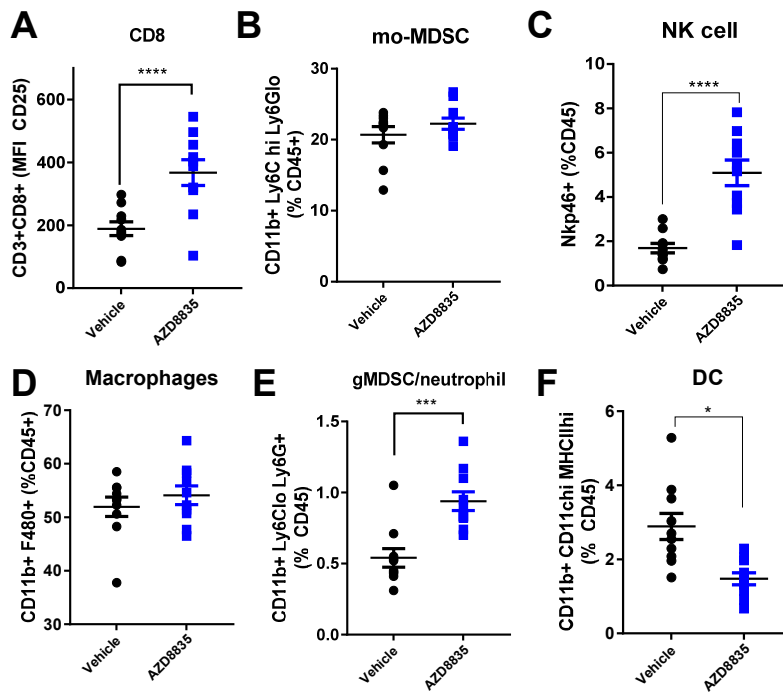

Supplement: 40425_2018_457_MOESM4_ESM.pdf [file 40425_2018_457_MOESM4_ESM.pdf]
